# Supplementary material for: Analyzing the Effects of Age, Time of Day, and Experiment on the Basal Locomotor Activity and Light-Off Visual Motor Response Assays in Zebrafish Larvae
Source: MDPI journal article supplement (doi:10.3390/toxics12050349), 2024-05-09
Supplement: s1 [file s1]

## **Supplementary Material**

### **Analyzing the effect of age, time of the day and the experiment on the basal locomotor activity and light-off visual motor response assays in zebrafish larvae**

Niki Tagkalidou, Cristiana Roberta Multisanti, Maria Jose Bleda, Juliette Bedrossiantz, Eva Prats, Caterina Faggio, Carlos Barata, Demetrio Raldúa

## Supplementary Figures

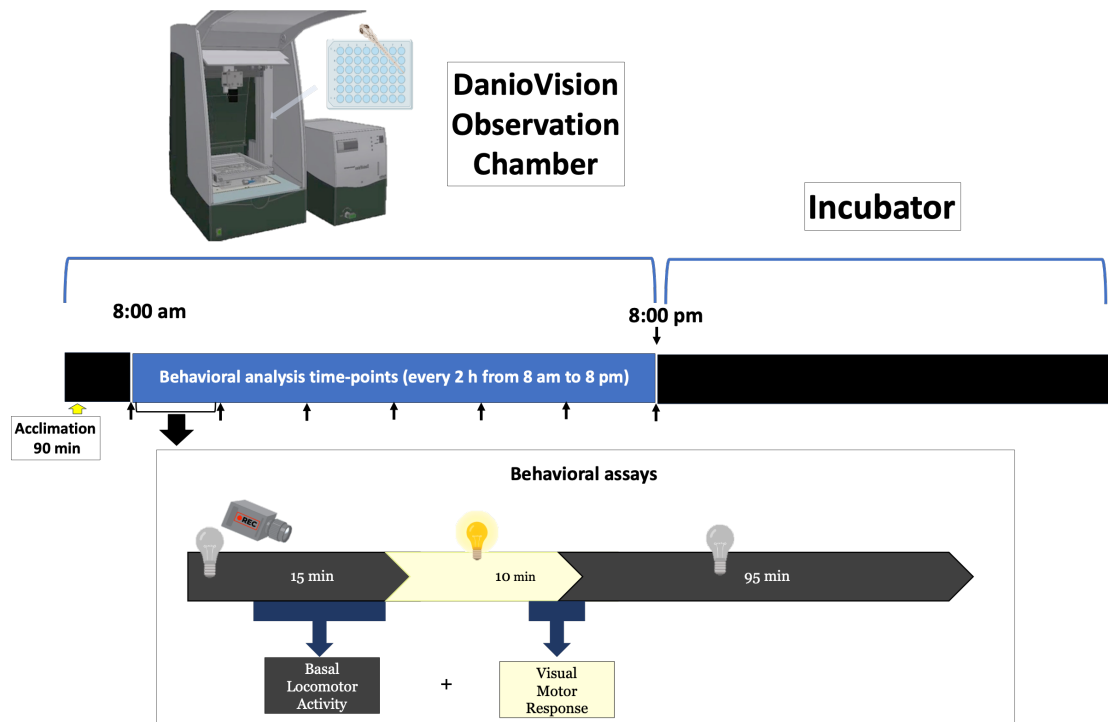

**Figure S1.** Experimental procedure used for the validation of the basal locomotor activity and light off-visual motor response in zebrafish larvae. The night before the validation experiment, zebrafish larvae were transferred to an incubator at 28°C in the dark (from 8 pm to 6:30 am under our conditions). On the day of the experiment, 90 min before the start of recording (8 am), the microplate containing the larvae was transferred to a DanioVision Observation Chamber for acclimation, where it remained at 28°C throughout the 12-hour procedure (from 8 am to 8 pm). A task consisting of 15 min dark/ 10 min light/ 95 min dark was programmed with Ethovision software. This task sequence was repeated 7 times. Upon completion the plate was transferred back to the incubator and the whole process was repeated on the subsequent days.

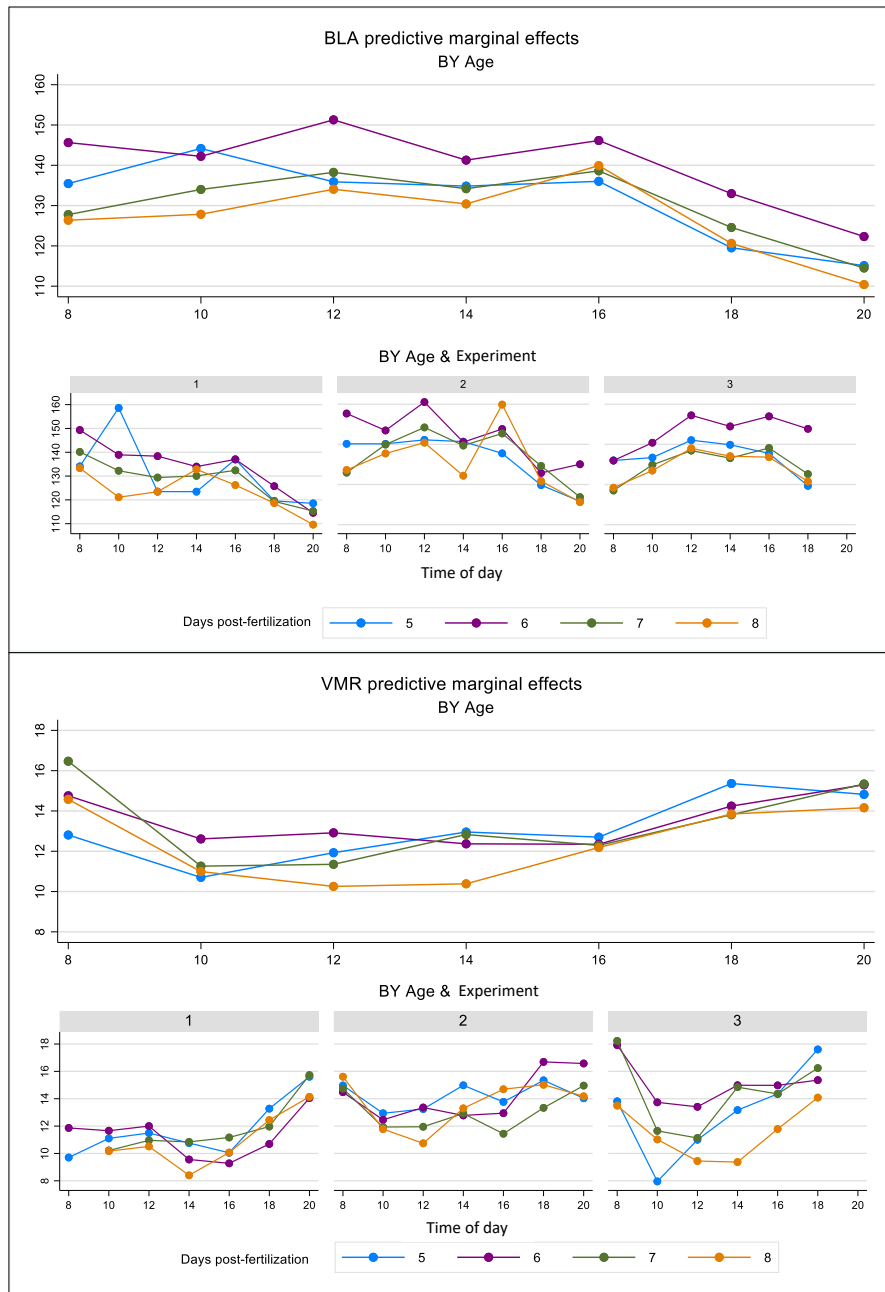

**Figure S2.** Understanding the 3-way interaction between age, hours and the experiment for BLA and light-off VMR in the RE linear regression model.

## Supplementary Tables

**Table S1.** Random-Effects (RE) linear regression model estimation using generalized least squares (GLS) for BLA and light-off VMR variables. Main effects, full two-way interactions and the three-way interaction included.

| Variables               | Coef.    | BLA<br>(95% CI) |         | Coef.    | VMR†<br>(95% CI) |        |
|-------------------------|----------|-----------------|---------|----------|------------------|--------|
| Age [days]              |          |                 |         |          |                  |        |
| 5                       | 0.73     | (-9.12 ;        | 10.57)  | -5.78 *  | (-11.33 ;        | -0.24) |
| 6                       | 15.98 *  | (6.14 ;         | 25.83)  | -3.62    | (-8.42 ;         | 1.18)  |
| 7                       | 6.80     | (-3.04 ;        | 16.65)  | -0.06    | (-4.86 ;         | 4.74)  |
| 8 (Ref.)                |          |                 |         |          |                  |        |
| Time [hours]            |          |                 |         |          |                  |        |
| 8:00 (Ref.)             |          |                 |         |          |                  |        |
| 10:00                   | -12.24 * | (-22.09 ;       | -2.40)  | -5.31 *  | (-10.86 ;        | 0.23)  |
| 12:00                   | -9.93 *  | (-19.78 ;       | -0.09)  | -4.97 *  | (-10.52 ;        | 0.58)  |
| 14:00                   | -0.52    | (-10.36 ;       | 9.33)   | -7.08 *  | (-12.63 ;        | -1.54) |
| 16:00                   | -7.14    | (-16.99 ;       | 2.70)   | -5.42 *  | (-10.97 ;        | 0.13)  |
| 18:00                   | -14.71 * | (-24.56 ;       | -4.87)  | -3.04    | (-8.60 ;         | 2.51)  |
| 20:00                   | -23.75 * | (-33.59 ;       | -13.90) | -1.35    | (-6.15 ;         | 3.46)  |
| Experiment              |          |                 |         |          |                  |        |
| 1 (Ref.)                |          |                 |         |          |                  |        |
| 2                       | -6.14    | (-16.81 ;       | 4.53)   | 0.12     | (-4.82 ;         | 5.06)  |
| 3                       | -14.96 * | (-25.69 ;       | -4.23)  | -1.99    | (-7.66 ;         | 3.69)  |
| Day # Time              |          |                 |         |          |                  |        |
| 5 10:00                 | 36.78 *  | (22.85 ;        | 50.70)  | 6.71 *   | (0.52 ;          | 12.91) |
| 5 12:00                 | -0.66    | (-14.58 ;       | 13.27)  | 6.76 *   | (0.57 ;          | 12.96) |
| 5 14:00                 | -10.12   | (-24.04 ;       | 3.81)   | 8.14 *   | (1.94 ;          | 14.34) |
| 5 16:00                 | 10.07    | (-3.86 ;        | 23.99)  | 5.77 *   | (-0.43 ;         | 11.97) |
| 5 18:00                 | 0.21     | (-13.71 ;       | 14.14)  | 6.62 *   | (0.41 ;          | 12.82) |
| 5 20:00                 | 8.21     | (-5.71 ;        | 22.13)  | 7.25 *   | (1.71 ;          | 12.79) |
| 6 10:00                 | 1.83     | (-12.09 ;       | 15.75)  | 5.11 *   | (-0.43 ;         | 10.65) |
| 6 12:00                 | -1.04    | (-14.96 ;       | 12.89)  | 5.11 *   | (-0.43 ;         | 10.65) |
| 6 14:00                 | -14.84 * | (-28.77 ;       | -0.92)  | 4.78 *   | (-0.76 ;         | 10.32) |
| 6 16:00                 | -5.19    | (-19.11 ;       | 8.74)   | 2.83     | (-2.71 ;         | 8.37)  |
| 6 18:00                 | -8.87    | (-22.79 ;       | 5.06)   | 1.87     | (-3.68 ;         | 7.42)  |
| 6 20:00                 | -11.03   | (-24.95 ;       | 2.89)   | 3.53 *   | (-0.39 ;         | 7.45)  |
| 7 10:00                 | 4.32     | (-9.61 ;        | 18.24)  | 0.11     | (-5.43 ;         | 5.65)  |
| 7 12:00                 | -0.84    | (-14.76 ;       | 13.08)  | 0.50     | (-5.04 ;         | 6.05)  |
| 7 14:00                 | -9.56    | (-23.48 ;       | 4.36)   | 2.50     | (-3.04 ;         | 8.05)  |
| 7 16:00                 | -0.61    | (-14.53 ;       | 13.31)  | 1.16     | (-4.38 ;         | 6.70)  |
| 7 18:00                 | -6.06    | (-19.98 ;       | 7.86)   | -0.42    | (-5.96 ;         | 5.13)  |
| 7 20:00                 | -1.10    | (-15.02 ;       | 12.83)  | 1.65     | (-2.26 ;         | 5.56)  |
| Day # Experiment        |          |                 |         |          |                  |        |
| 5 2                     | 12.34 *  | (-1.59 ;        | 26.26)  | 5.14 *   | (-0.41 ;         | 10.70) |
| 5 3                     | 12.86    | (-1.14 ;        | 26.86)  | 6.10 *   | (-0.12 ;         | 12.32) |
| 6 2                     | 12.18 *  | (-1.75 ;        | 26.10)  | 2.49     | (-1.44 ;         | 6.42)  |
| 6 3                     | -2.45    | (-16.44 ;       | 11.55)  | 8.04 *   | (2.48 ;          | 13.61) |
| 7 2                     | -8.10    | (-22.03 ;       | 5.82)   | -0.81    | (-4.74 ;         | 3.12)  |
| 7 3                     | -8.18    | (-22.18 ;       | 5.81)   | 4.79 *   | (-0.77 ;         | 10.36) |
| Time # Experiment       |          |                 |         |          |                  |        |
| 10:00 2                 | 20.50 *  | (6.58 ;         | 34.42)  | 1.48     | (-4.06 ;         | 7.03)  |
| 10:00 3                 | 20.78 *  | (6.78 ;         | 34.78)  | 2.84     | (-3.38 ;         | 9.07)  |
| 12:00 2                 | 23.57 *  | (9.65 ;         | 37.49)  | 0.10     | (-5.45 ;         | 5.65)  |
| 12:00 3                 | 29.54 *  | (15.54 ;        | 43.54)  | 0.92     | (-5.32 ;         | 7.16)  |
| 14:00 2                 | -2.31    | (-16.23 ;       | 11.62)  | 4.77 *   | (-0.78 ;         | 10.32) |
| 14:00 3                 | 16.23 *  | (2.24 ;         | 30.23)  | 2.95     | (-3.29 ;         | 9.19)  |
| 16:00 2                 | 39.75 *  | (25.83 ;        | 53.67)  | 4.51     | (-1.04 ;         | 10.06) |
| 16:00 3                 | 22.36 *  | (8.36 ;         | 36.36)  | 3.71     | (-2.51 ;         | 9.93)  |
| 18:00 2                 | 9.21     | (-4.71 ;        | 23.14)  | 2.46     | (-3.10 ;         | 8.01)  |
| 18:00 3                 | 17.85 *  | (3.85 ;         | 31.85)  | 3.63     | (-2.63 ;         | 9.88)  |
| 20:00 2                 | 7.74     | (-6.18 ;        | 21.66)  | -0.08    | (-4.01 ;         | 3.84)  |
| 20:00 3                 | (n.e.)   |                 |         | (n.e.)   |                  |        |
| Day # Time # Experiment |          |                 |         |          |                  |        |
| 5 10:00 2               | -45.05 * | (-64.74 ;       | -25.36) | -4.92    | (-11.71 ;        | 1.88)  |
| 5 10:00 3               | -43.88 * | (-63.67 ;       | -24.09) | -10.10 * | (-17.47 ;        | -2.73) |
| 5 12:00 2               | -11.01   | (-30.70 ;       | 8.68)   | -3.62    | (-10.41 ;        | 3.17)  |
| 5 12:00 3               | -8.85    | (-28.64 ;       | 10.95)  | -5.52    | (-12.90 ;        | 1.86)  |
| 5 14:00 2               | 14.03    | (-5.66 ;        | 33.72)  | -5.82 *  | (-12.62 ;        | 0.98)  |
| 5 14:00 3               | 2.22     | (-17.57 ;       | 22.02)  | -4.66 *  | (-12.04 ;        | 2.72)  |
| 5 16:00 2               | -47.41 * | (-67.10 ;       | -27.72) | -6.06 *  | (-12.85 ;        | 0.74)  |
| 5 16:00 3               | -21.75 * | (-41.55 ;       | -1.96)  | -3.52    | (-10.88 ;        | 3.84)  |
| 5 18:00 2               | -15.29   | (-34.98 ;       | 4.40)   | -5.65    | (-12.45 ;        | 1.14)  |
| 5 18:00 3               | -16.01   | (-35.81 ;       | 3.78)   | -3.41    | (-10.81 ;        | 3.99)  |
| 5 20:00 2               | -20.82 * | (-40.51 ;       | -1.13)  | -6.75 *  | (-12.30 ;        | -1.21) |
| 5 20:00 3               | (n.e.)   |                 |         | (n.e.)   |                  |        |
| 6 10:00 2               | -18.54 * | (-38.23 ;       | 1.15)   | -3.30    | (-8.84 ;         | 2.24)  |
| 6 10:00 3               | -1.49    | (-21.29 ;       | 18.30)  | -6.82 *  | (-13.64 ;        | 0.00)  |
| 6 12:00 2               | -6.89    | (-26.58 ;       | 12.80)  | -1.36    | (-6.90 ;         | 4.18)  |
| 6 12:00 3               | 3.97     | (-15.83 ;       | 23.76)  | -5.56    | (-12.40 ;        | 1.27)  |
| 6 14:00 2               | 3.41     | (-16.28 ;       | 23.10)  | -4.16    | (-9.71 ;         | 1.38)  |
| 6 14:00 3               | 16.13    | (-3.66 ;        | 35.93)  | -3.58    | (-10.43 ;        | 3.27)  |
| 6 16:00 2               | -35.14 * | (-54.83 ;       | -15.45) | -3.45    | (-8.99 ;         | 2.09)  |
| 6 16:00 3               | 12.00    | (-7.79 ;        | 31.80)  | -4.06    | (-10.89 ;        | 2.76)  |
| 6 18:00 2               | -15.27   | (-34.96 ;       | 4.42)   | 0.93     | (-4.62 ;         | 6.48)  |
| 6 18:00 3               | 21.53 *  | (1.74 ;         | 41.33)  | -5.02    | (-11.86 ;        | 1.83)  |
| 6 20:00 2               | 1.74     | (-17.95 ;       | 21.43)  | (n.e.)   |                  |        |
| 6 20:00 3               | (n.e.)   |                 |         | (n.e.)   |                  |        |
| 7 10:00 2               | 1.42     | (-18.27 ;       | 21.11)  | 0.92     | (-4.62 ;         | 6.46)  |
| 7 10:00 3               | -0.08    | (-19.88 ;       | 19.71)  | -4.21    | (-11.04 ;        | 2.61)  |
| 7 12:00 2               | 9.73     | (-9.96 ;        | 29.42)  | 1.58     | (-3.97 ;         | 7.12)  |
| 7 12:00 3               | 1.12     | (-18.68 ;       | 20.91)  | -3.55    | (-10.40 ;        | 3.29)  |
| 7 14:00 2               | 25.89 *  | (6.20 ;         | 45.58)  | -2.01    | (-7.55 ;         | 3.53)  |
| 7 14:00 3               | 9.93     | (-9.86 ;        | 29.73)  | -1.76    | (-8.60 ;         | 5.09)  |
| 7 16:00 2               | -12.49   | (-32.20 ;       | 7.23)   | -3.55    | (-9.09 ;         | 1.99)  |
| 7 16:00 3               | 6.57     | (-13.23 ;       | 26.36)  | -3.33    | (-10.15 ;        | 3.49)  |
| 7 18:00 2               | 14.91    | (-4.81 ;        | 34.62)  | -0.40    | (-5.95 ;         | 5.14)  |
| 7 18:00 3               | 11.09    | (-8.70 ;        | 30.89)  | -2.16    | (-9.01 ;         | 4.69)  |
| 7 20:00 2               | 4.91     | (-14.78 ;       | 24.60)  | (n.e.)   |                  |        |
| 7 20:00 3               | (n.e.)   |                 |         | (n.e.)   |                  |        |
| Constant                | 133.35 * | (125.81 ;       | 140.90) | 15.49 *  | (10.23 ;         | 20.74) |
| Sigma_u                 | 10.28    |                 |         | 2.79     |                  |        |
| Sigma_e                 | 24.60    |                 |         | 6.89     |                  |        |
| p                       | 0.1487   |                 |         | 0.1408   |                  |        |
| R <sup>2</sup> within   | 18.84%   |                 |         | 8.17%    |                  |        |
| R <sup>2</sup> between  | 6.15%    |                 |         | 8.95%    |                  |        |
| R <sup>2</sup>          | 16.80%   |                 |         | 8.40%    |                  |        |

<sup>†</sup> light-off VMR restricted to the interval [-25;50]; \*  $P \leq 0.05$ ; °  $0.05 < P \leq 0.10$ ; a#b means interaction between a and b variables; (Ref.) means reference category;  $\rho$  is the fraction of the error variance due to the differences between individuals (Intraclass Correlation of the error);  $R^2_{\text{Within}}$ ,  $R^2_{\text{Between}}$  and  $R^2$  and are the within, between and global correlations squared expressed in percentages; n.e. means not estimable.

**Table S2.** Pairwise comparisons of predictive margins of BLA for age. Differences and P-values corrected using the Bonferroni method to account for multiple comparisons.

| Age                |   |        | A                           |                  |                  |
|--------------------|---|--------|-----------------------------|------------------|------------------|
|                    |   |        | 6                           | 7                | 8                |
| Predictive Margins |   |        | 141.16                      | 131.06           | 127.91           |
| B                  | 5 | 132.39 | 8.77 <sup>†</sup><br>0.000* | -1.33<br>1.000   | -4.48<br>0.000*  |
|                    | 6 | 141.16 |                             | -10.10<br>0.000* | -13.25<br>0.000* |
|                    | 7 | 131.06 |                             |                  | -3.15<br>0.031*  |

Note. <sup>†</sup> Difference between the predictive margins (A-B); \*  $P \leq 0.05$ ; °  $0.05 < P \leq 0.10$ ; Shaded cells indicate non-statistically significant differences.

**Table S3.** Pairwise comparisons of predictive margins of BLA for time of the day. Differences and P-values corrected using the Bonferroni method to account for multiple comparisons.

| Time of the day    |       |        | A                          |                |                 |                |                  |                  |
|--------------------|-------|--------|----------------------------|----------------|-----------------|----------------|------------------|------------------|
|                    |       |        | 10:00                      | 12:00          | 14:00           | 16:00          | 18:00            | 20:00            |
| Predictive Margins |       |        | 137.06                     | 139.87         | 135.18          | 140.18         | 124.42           | 115.58           |
| B                  | 8:00  | 133.81 | 3.25 <sup>†</sup><br>0.536 | 6.06<br>0.001* | 1.37<br>1.000   | 6.37<br>0.000* | -9.39<br>0.000*  | -18.23<br>0.000* |
|                    | 10:00 | 137.06 |                            | 2.81<br>1.000  | -1.88<br>1.000  | 3.12<br>0.672  | -12.64<br>0.000* | -21.48<br>0.000* |
|                    | 12:00 | 139.87 |                            |                | -4.69<br>0.027* | 0.31<br>1.000  | -15.45<br>0.000* | -24.29<br>0.000* |
|                    | 14:00 | 135.18 |                            |                |                 | 5.00<br>0.012* | -10.76<br>0.000* | -19.60<br>0.000* |
|                    | 16:00 | 140.18 |                            |                |                 |                | -15.76<br>0.000* | -24.60<br>0.000* |
|                    | 18:00 | 124.42 |                            |                |                 |                |                  | -8.84<br>0.000*  |

Note. <sup>†</sup> Difference between the predictive margins (A-B); \*  $P \leq 0.05$ ; °  $0.05 < P \leq 0.10$ ; Shaded cells indicate non-statistically significant differences.

**Table S4.** Pairwise comparisons of predictive margins of BLA for time of the day and age. Differences and P-values corrected using the Bonferroni method to account for multiple comparisons.

| DAY 5 | Time of the day    |        |                             | A                           |                 |                  |                  |                  |                  |
|-------|--------------------|--------|-----------------------------|-----------------------------|-----------------|------------------|------------------|------------------|------------------|
|       |                    |        |                             | 10:00                       | 12:00           | 14:00            | 16:00            | 18:00            | 20:00            |
|       | Predictive Margins |        |                             | 144.17                      | 135.89          | 134.83           | 136.02           | 119.53           | 115.10           |
| B     | 8:00               | 135.47 | 8.70 <sup>†</sup><br>0.058° | 0.42<br>1.000               | -0.64<br>1.000  | 0.55<br>1.000    | -15.94<br>0.000* | -20.37<br>0.000* |                  |
|       | 10:00              | 144.17 |                             | -8.28<br>0.094°             | -9.34<br>0.028* | -8.15<br>0.107   | -24.64<br>0.000* | -29.07<br>0.000* |                  |
|       | 12:00              | 135.89 |                             | -1.06<br>1.000              | 0.13<br>1.000   | -16.36<br>0.000* | -20.79<br>0.000* |                  |                  |
|       | 14:00              | 134.83 |                             |                             | 1.19<br>1.000   | -15.30<br>0.000* | -19.73<br>0.000* |                  |                  |
|       | 16:00              | 136.02 |                             |                             |                 | -16.49<br>0.000* | -20.92<br>0.000* |                  |                  |
|       | 18:00              | 119.53 |                             |                             |                 |                  |                  | -4.43<br>1.000   |                  |
| DAY 6 |                    |        | Predictive Margins          | 142.23                      | 151.28          | 141.29           | 146.15           | 132.97           | 122.32           |
|       | B                  | 8:00   | 145.64                      | -3.41 <sup>†</sup><br>1.000 | 5.64<br>1.000   | -4.35<br>1.000   | 0.51<br>1.000    | -12.67<br>0.000* | -23.32<br>0.000* |
|       |                    | 10:00  | 142.23                      | 9.05<br>0.039*              |                 | -0.94<br>1.000   | 3.92<br>1.000    | -9.26<br>0.031*  | -19.91<br>0.000* |
|       |                    | 12:00  | 151.28                      |                             |                 | -9.99<br>0.012*  | -5.13<br>1.000   | -18.31<br>0.000* | -28.96<br>0.000* |
|       |                    | 14:00  | 141.29                      |                             |                 | 4.86<br>1.000    | -8.32<br>0.090°  | -18.97<br>0.000* |                  |
|       |                    | 16:00  | 146.15                      |                             |                 |                  | -13.18<br>0.000* | -23.83<br>0.000* |                  |
|       |                    | 18:00  | 132.97                      |                             |                 |                  |                  |                  | -10.65<br>0.026* |
| DAY 7 |                    |        | Predictive Margins          | 134.00                      | 138.25          | 134.20           | 138.63           | 124.57           | 114.51           |
|       | B                  | 8:00   | 127.76                      | 6.24<br>0.673               | 10.49<br>0.007* | 6.44<br>0.566    | 10.87<br>0.004*  | -3.19<br>1.000   | -13.25<br>0.001* |
|       |                    | 10:00  | 134.00                      | 4.25<br>1.000               |                 | 0.20<br>1.000    | 4.63<br>1.000    | -9.43<br>0.025*  | -19.49<br>0.000* |
|       |                    | 12:00  | 138.25                      |                             |                 | -4.05<br>1.000   | 0.38<br>1.000    | -13.68<br>0.000* | -23.74<br>0.000* |
|       |                    | 14:00  | 134.20                      |                             |                 | 4.43<br>1.000    | -9.63<br>0.020*  | -19.69<br>0.000* |                  |
|       |                    | 16:00  | 138.63                      |                             |                 |                  | -14.06<br>0.000* | -24.12<br>0.000* |                  |
|       |                    | 18:00  | 124.57                      |                             |                 |                  |                  |                  | -10.06<br>0.050* |
| DAY 8 |                    |        | Predictive Margins          | 127.84                      | 134.06          | 130.42           | 139.92           | 120.62           | 110.40           |
|       | B                  | 8:00   | 126.37                      | 1.47<br>1.000               | 7.69<br>0.174   | 4.05<br>1.000    | 13.55<br>0.000*  | -5.75<br>1.000   | -15.97<br>0.000* |
|       |                    | 10:00  | 127.84                      | 6.22<br>0.686               |                 | 2.58<br>1.000    | 12.08<br>0.001*  | -7.22<br>0.274   | -17.44<br>0.000* |
|       |                    | 12:00  | 134.06                      |                             |                 | -3.64<br>1.000   | 5.86<br>0.922    | -13.44<br>0.000* | -23.66<br>0.000* |
|       |                    | 14:00  | 130.42                      |                             |                 |                  | 9.50<br>0.023*   | -9.80<br>0.016*  | -20.02<br>0.000* |
|       |                    | 16:00  | 139.92                      |                             |                 |                  | -19.30<br>0.000* | -29.52<br>0.000* |                  |
|       |                    | 18:00  | 120.62                      |                             |                 |                  |                  |                  | -10.22<br>0.042* |

Note. <sup>†</sup> Difference between the predictive margins (A-B); \* P ≤ 0.05; ° 0.05 < P ≤ 0.10; Shaded cells indicate non-statistically significant differences.



**Table S5.** Pairwise comparisons of predictive margins of light-off VMR for age. Differences and P-values corrected using the Bonferroni method to account for multiple comparisons.

| Age |   |                    | A                          |                |                 |
|-----|---|--------------------|----------------------------|----------------|-----------------|
|     |   |                    | 6                          | 7              | 8               |
|     |   | Predictive Margins | 13.42                      | 13.07          | 12.13           |
| B   | 5 | 12.95              | 0.47 <sup>†</sup><br>0.839 | 0.12<br>1.000  | -0.82<br>0.066° |
|     | 6 | 13.42              |                            | -0.35<br>1.000 | -1.29<br>0.000* |
|     | 7 | 13.07              |                            |                | -0.94<br>0.024* |

Note. <sup>†</sup> Difference between the predictive margins (A-B); \*  $P \leq 0.05$ ; °  $0.05 < P \leq 0.10$ ; Shaded cells indicate non-statistically significant differences.

**Table S6.** Pairwise comparisons of predictive margins of light-off VMR for time of the day. Differences and P-values corrected using the Bonferroni method to account for multiple comparisons.

| Time of the day    |       |       | A                            |                 |                 |                 |                |                |
|--------------------|-------|-------|------------------------------|-----------------|-----------------|-----------------|----------------|----------------|
|                    |       |       | 10:00                        | 12:00           | 14:00           | 16:00           | 18:00          | 20:00          |
| Predictive Margins |       |       | 11.39                        | 11.62           | 12.14           | 12.38           | 14.32          | 14.91          |
| B                  | 8:00  | 14.48 | -3.09 <sup>†</sup><br>0.000* | -2.86<br>0.000* | -2.34<br>0.000* | -2.10<br>0.000* | -0.16<br>1.000 | 0.43<br>1.000  |
|                    | 10:00 | 11.39 |                              | 0.23<br>1.000   | 0.75<br>1.000   | 0.99<br>0.337   | 2.93<br>0.000* | 3.52<br>0.000* |
|                    | 12:00 | 11.62 |                              |                 | 0.52<br>1.000   | 0.76<br>1.000   | 2.70<br>0.000* | 3.29<br>0.000* |
|                    | 14:00 | 12.14 |                              |                 |                 | 0.24<br>1.000   | 2.18<br>0.000* | 2.77<br>0.000* |
|                    | 16:00 | 12.38 |                              |                 |                 |                 | 1.94<br>0.000* | 2.53<br>0.000* |
|                    | 18:00 | 14.32 |                              |                 |                 |                 |                | 0.59<br>1.000  |

Note. <sup>†</sup> Difference between the predictive margins (A-B); \*  $P \leq 0.05$ ; °  $0.05 < P \leq 0.10$ ; Shaded cells indicate non-statistically significant differences.

**Table S7.** Pairwise comparisons of predictive margins of light-off VMR for time of the day and age. Differences and P-values corrected using the Bonferroni method to account for multiple comparisons.

| DAY 5 | Time of the day    |       | A                            |                 |                 |                 |                |                |
|-------|--------------------|-------|------------------------------|-----------------|-----------------|-----------------|----------------|----------------|
|       |                    |       | 10:00                        | 12:00           | 14:00           | 16:00           | 18:00          | 20:00          |
|       | Predictive Margins |       | 10.70                        | 11.93           | 12.96           | 12.70           | 15.37          | 14.82          |
| B     | 8:00               | 13.45 | -2.75 <sup>†</sup><br>0.022* | -1.52<br>1.000  | -0.49<br>1.000  | -0.75<br>1.000  | 1.92<br>0.477  | 1.37<br>1.000  |
|       | 10:00              | 10.70 |                              | 1.23<br>1.000   | 2.26<br>0.122   | 2.00<br>0.305   | 4.67<br>0.000* | 4.12<br>0.000* |
|       | 12:00              | 11.93 |                              |                 | 1.03<br>1.000   | 0.77<br>1.000   | 3.44<br>0.001* | 2.89<br>0.038* |
|       | 14:00              | 12.96 |                              |                 |                 | -0.26<br>1.000  | 2.41<br>0.072° | 1.86<br>0.950  |
|       | 16:00              | 12.70 |                              |                 |                 |                 | 2.67<br>0.024* | 2.12<br>0.466  |
|       | 18:00              | 15.37 |                              |                 |                 |                 |                | -0.55<br>1.000 |
| DAY 6 | Predictive Margins |       | 12.61                        | 12.92           | 12.38           | 12.36           | 14.23          | 15.32          |
|       | 8:00               | 15.30 | -2.71 <sup>†</sup><br>0.025* | -2.38<br>0.088° | -2.92<br>0.010* | -2.94<br>0.009* | -1.07<br>1.000 | 0.02<br>1.000  |
|       | 10:00              | 12.61 |                              | 0.31<br>1.000   | -0.23<br>1.000  | -0.25<br>1.000  | 1.62<br>0.971  | 2.71<br>0.074° |
|       | 12:00              | 12.92 |                              |                 | -0.54<br>1.000  | -0.56<br>1.000  | 1.31<br>1.000  | 2.40<br>0.206  |
|       | 14:00              | 12.38 |                              |                 |                 | -0.02<br>1.000  | 1.85<br>0.508  | 2.94<br>0.034* |
|       | 16:00              | 12.36 |                              |                 |                 |                 | 1.87<br>0.473  | 2.96<br>0.032* |
|       | 18:00              | 14.23 |                              |                 |                 |                 |                | 1.09<br>1.000  |
| DAY 7 | Predictive Margins |       | 11.26                        | 11.35           | 12.83           | 12.29           | 13.80          | 15.34          |
|       | 8:00               | n.e.  |                              |                 |                 |                 |                |                |
|       | 10:00              | 11.26 |                              | 0.09<br>1.000   | 1.57<br>1.000   | 1.03<br>1.000   | 2.54<br>0.041* | 4.08<br>0.000* |
|       | 12:00              | 11.35 |                              |                 | 1.48<br>1.000   | 0.94<br>1.000   | 2.45<br>0.059° | 3.99<br>0.000* |
|       | 14:00              | 12.83 |                              |                 |                 | -0.54<br>1.000  | 0.97<br>1.000  | 2.51<br>0.143  |
|       | 16:00              | 12.29 |                              |                 |                 |                 | 1.51<br>1.000  | 3.05<br>0.021* |
|       | 18:00              | 13.80 |                              |                 |                 |                 |                | 1.54<br>1.000  |
| DAY 8 | Predictive Margins |       | 10.99                        | 10.25           | 10.37           | 12.19           | 13.85          | 14.16          |
|       | 8:00               | n.e.  |                              |                 |                 |                 |                |                |
|       | 10:00              | 10.99 |                              | -0.74<br>1.000  | -0.62<br>1.000  | 1.20<br>1.000   | 2.86<br>0.011* | 3.17<br>0.014* |
|       | 12:00              | 10.25 |                              |                 | 0.12<br>1.000   | 1.94<br>0.380   | 3.60<br>0.000* | 3.91<br>0.001* |
|       | 14:00              | 10.37 |                              |                 |                 | 1.82<br>0.570   | 3.48<br>0.001* | 3.79<br>0.001* |
|       | 16:00              | 12.19 |                              |                 |                 |                 | 1.66<br>0.929  | 1.97<br>0.708  |
|       | 18:00              | 13.85 |                              |                 |                 |                 |                | 0.31<br>1.000  |

Note. <sup>†</sup> Difference between the predictive margins (A-B); \*  $P \leq 0.05$ ; °  $0.05 < P \leq 0.10$ ; n.e.: not estimable. Shaded cells indicate non-statistically significant differences.
